# Supplementary material for: Application of a CO2-stripping system for calcium removal to upgrade organic matter removal and sludge granulation in a leachate-fed EGSB bioreactor
Source: Royal Society of Chemistry journal article supplement (doi:10.1039/c5ra26444h), 2016-01-01
Supplement: c5ra26444h1.pdf [file c5ra26444h1.pdf]

# **Application of CO<sub>2</sub>-stripping system for calcium removal to upgrade organic matter removal and sludge granulation in a leachate-fed EGSB bioreactor**

**Xueqin Lu <sup>a,b</sup>, Shanping Chen <sup>c</sup>, Jinghuan Luo <sup>a</sup>, Guangren Qian <sup>a\*</sup>, Jingyong Liu <sup>a\*</sup>,  
Guangyin Zhen <sup>d</sup>, Yu-You Li <sup>b,e</sup>**

<sup>a</sup>School of Environmental and Chemical Engineering, Shanghai University, Shanghai 2004444, PR China

<sup>b</sup>Department of Civil and Environmental Engineering, Graduate School of Engineering, Tohoku University, Aoba 6-6-06, Aramakizi, Aoba-ku, Sendai, 980-8579, Japan.

<sup>c</sup>Shanghai Environment Engineering Design Institute Co., Ltd., Shanghai 200232, P. R. China

<sup>d</sup>Center for Material Cycles and Waste Management Research, National Institute for Environmental Studies, 16-2 Onogawa, Tsukuba, Ibaraki 305-8506, Japan

<sup>e</sup>Department of Frontier Science for Advanced Environment, Graduate School of Environmental Studies, Tohoku University, Aoba 6-6-20, Aramakizi, Aoba-ku, Sendai, 980-8579, Japan

## **Corresponding authors**

Jianyong Liu, Tel.: +86 21 66137769, Fax: +86 21 66137761, E-mail:

[liujianyong@shu.edu.cn](mailto:liujianyong@shu.edu.cn)

Guangren Qian, Tel.: +86 21 66137758, Fax: +86 21 66137761, E-mail: [grqian@shu.edu.cn](mailto:grqian@shu.edu.cn)

**Figure Legends:**

**Fig. 1S.** Typical EEM fluorescence spectra of soluble organic substances present in the leachate samples from the EGSB bioreactors A (a) and B (b).

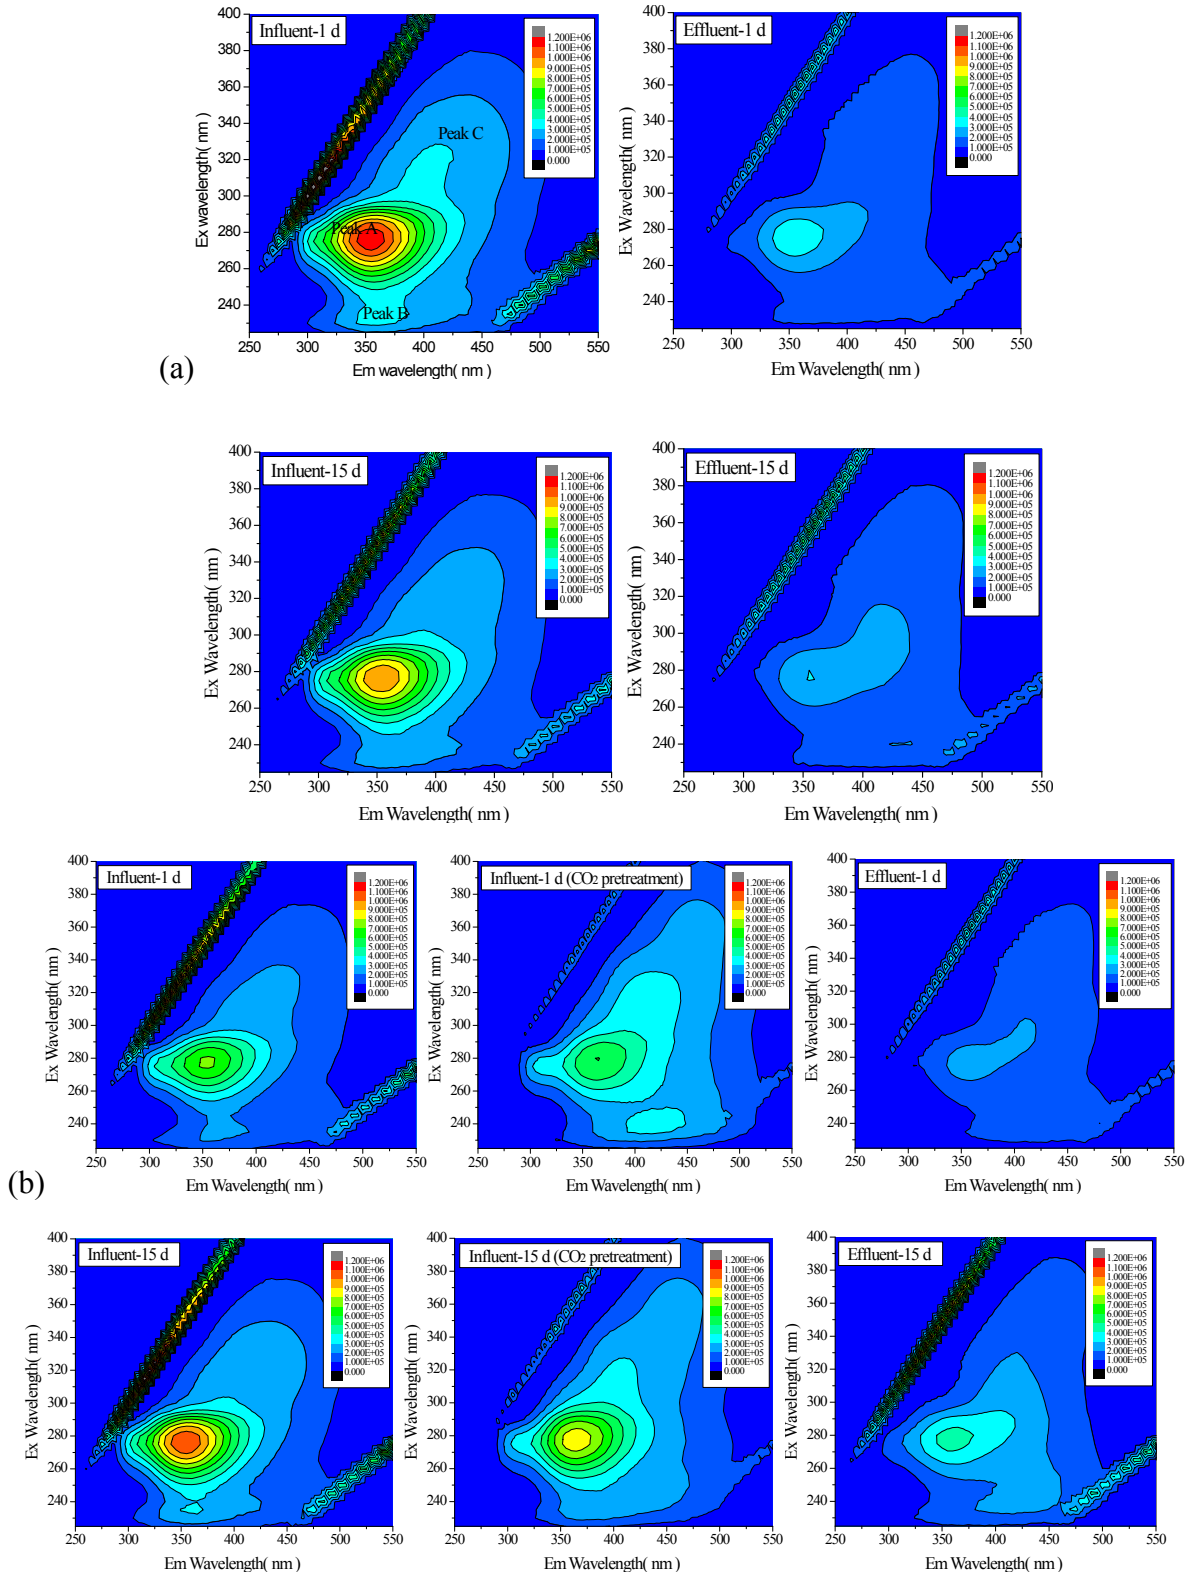

Fig. 1S.
